# Supplementary material for: Structural and biochemical characterization of the biuret hydrolase (BiuH) from the cyanuric acid catabolism pathway of Rhizobium leguminasorum bv. viciae 3841
Source: PLOS journal article supplement (doi:10.1371/journal.pone.0192736), 2018-02-09
Supplement: S2 (10.1371/journal.pone.0192736.s002) [file journal.pone.0192736.s002]

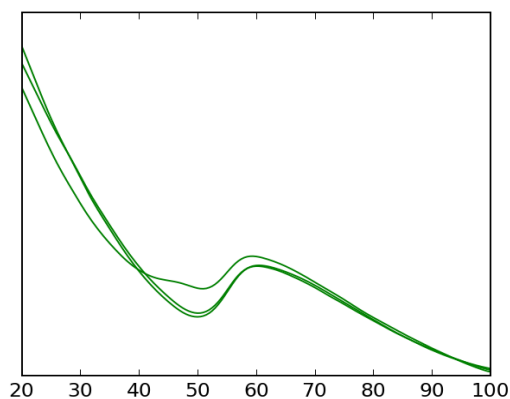

**Full interpretation of the results requires you to look at the individual melt curves.**

**77%** of curves were used in  $T_m$  estimations

Average estimation of error is **0.3 C**

Protein as supplied is **well behaved**

Protein as supplied:  $T_m = 54.92(\pm 0.09)$

Lysozyme Control: Passed

No Dye Control: Passed

No Protein Control: Passed

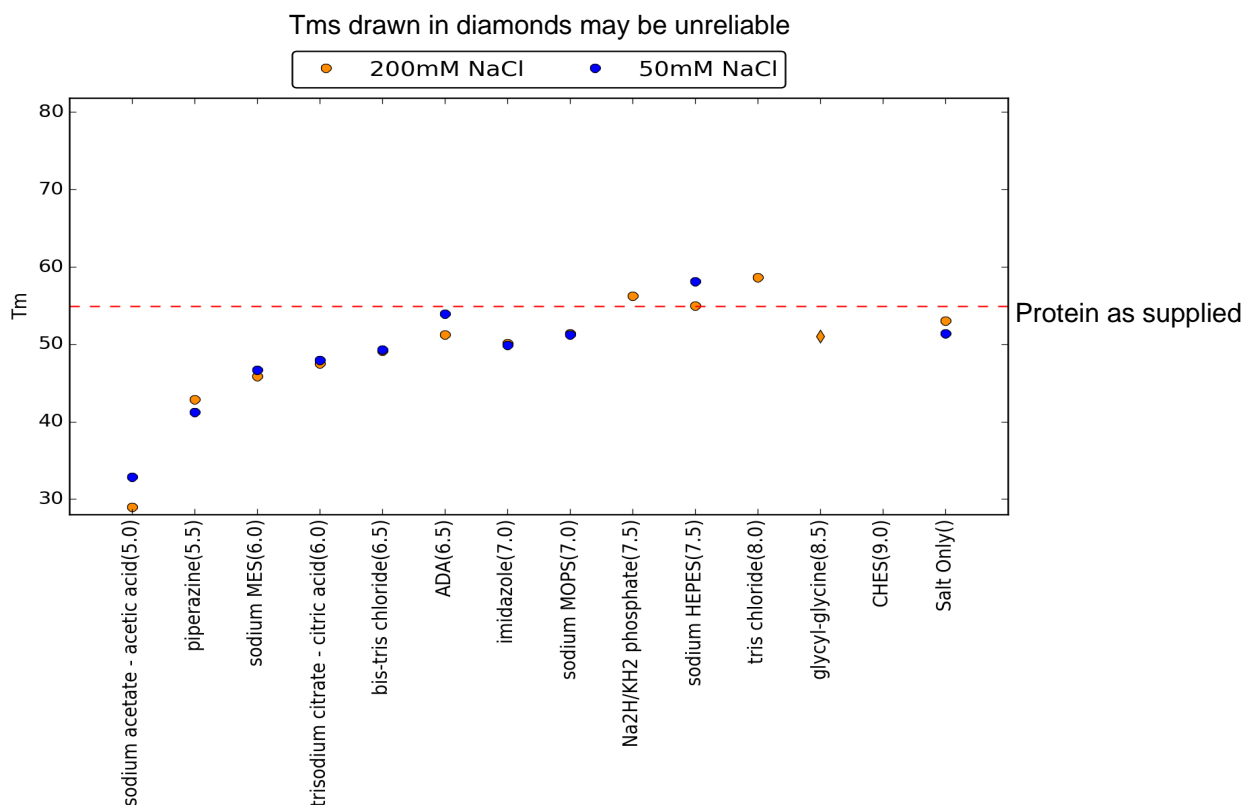

**Highest  $T_m = 58.68 \pm 0.25$**   
**(tris chloride / 200mM NaCl)**

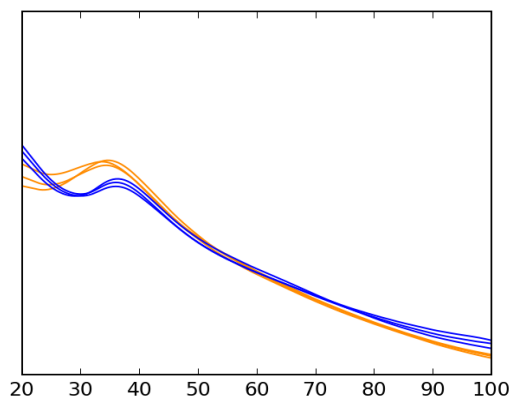

### sodium acetate - acetic acid (5.0)

| Grouped by | Tm              |
|------------|-----------------|
| 200mM NaCl | 29.0 (+/-0.1)   |
| 50mM NaCl  | 32.83 (+/-0.07) |

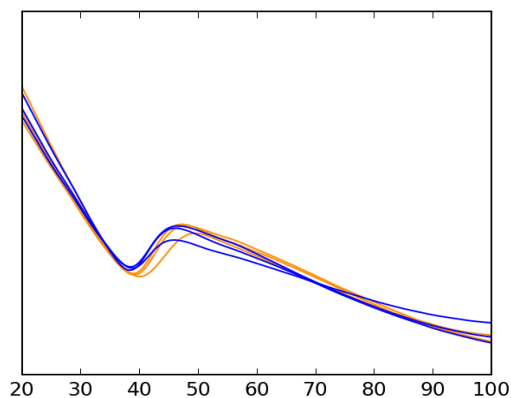

### piperazine (5.5)

| Grouped by | Tm              | Adjusted pH at Tm |
|------------|-----------------|-------------------|
| 200mM NaCl | 42.87 (+/-0.85) | 5.08              |
| 50mM NaCl  | 41.27 (+/-0.09) | 5.11              |

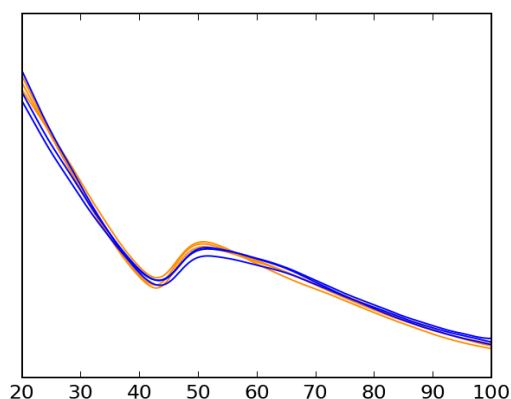

### sodium MES (6.0)

| Grouped by | Tm              | Adjusted pH at Tm |
|------------|-----------------|-------------------|
| 200mM NaCl | 45.85 (+/-0.13) | 5.8               |
| 50mM NaCl  | 46.68 (+/-0.07) | 5.79              |

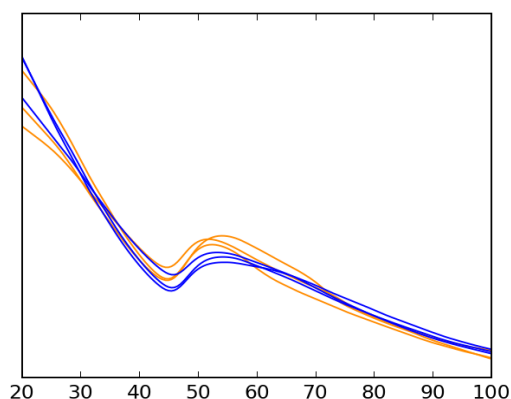

### trisodium citrate - citric acid (6.0)

| Grouped by | Tm              | Adjusted pH at Tm |
|------------|-----------------|-------------------|
| 200mM NaCl | 47.55 (+/-0.21) | 6.11              |
| 50mM NaCl  | 47.98 (+/-0.13) | 6.11              |

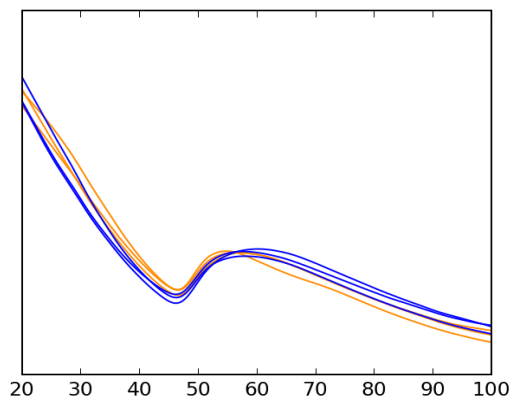

### bis-tris chloride (6.5)

| Grouped by | Tm              | Adjusted pH at Tm |
|------------|-----------------|-------------------|
| 200mM NaCl | 49.17 (+/-0.06) | 6.12              |
| 50mM NaCl  | 49.34 (+/-0.06) | 6.12              |

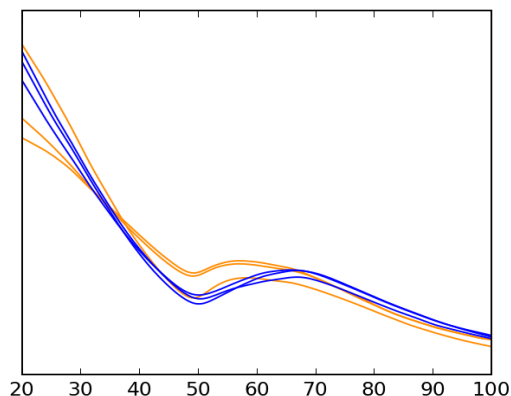

### ADA (6.5)

| Grouped by | Tm              | Adjusted pH at Tm |
|------------|-----------------|-------------------|
| 200mM NaCl | 51.27 (+/-0.12) | 6.39              |
| 50mM NaCl  | 53.98 (+/-0.56) | 6.38              |

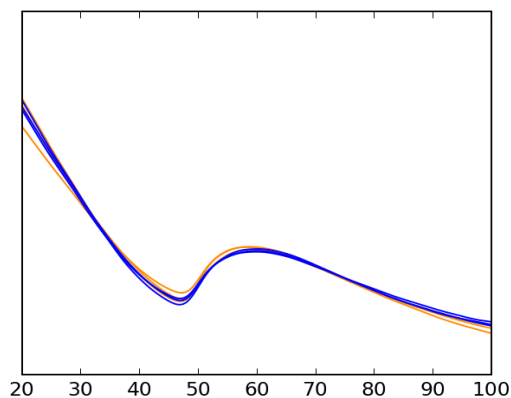

### imidazole (7.0)

| Grouped by | Tm              | Adjusted pH at Tm |
|------------|-----------------|-------------------|
| 200mM NaCl | 50.12 (+/-0.08) | 6.49              |
| 50mM NaCl  | 49.94 (+/-0.03) | 6.49              |

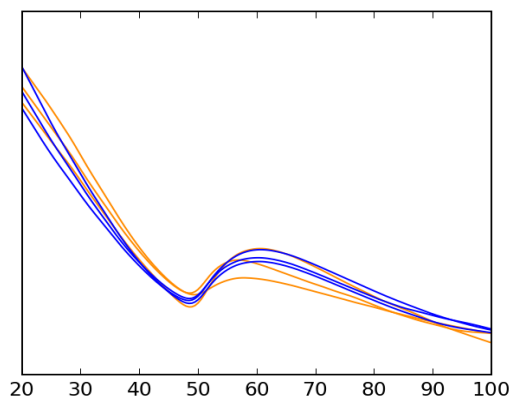

### sodium MOPS (7.0)

| Grouped by | Tm              | Adjusted pH at Tm |
|------------|-----------------|-------------------|
| 200mM NaCl | 51.43 (+/-0.26) | 6.74              |
| 50mM NaCl  | 51.25 (+/-0.04) | 6.74              |

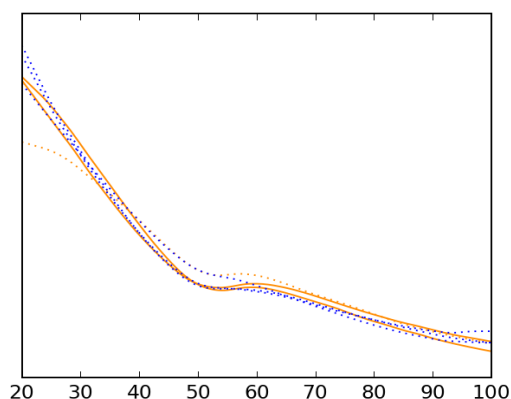

### Na2H/KH2 phosphate (7.5)

| Grouped by | Tm              | Adjusted pH at Tm |
|------------|-----------------|-------------------|
| 200mM NaCl | 56.27 (+/-0.01) | 7.7               |
| 50mM NaCl  | None            |                   |

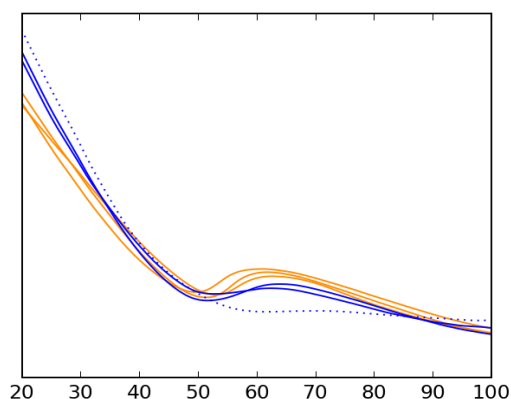

### sodium HEPES (7.5)

| Grouped by | Tm              | Adjusted pH at Tm |
|------------|-----------------|-------------------|
| 200mM NaCl | 55.01 (+/-1.24) | 7.29              |
| 50mM NaCl  | 58.1 (+/-0.35)  | 7.27              |

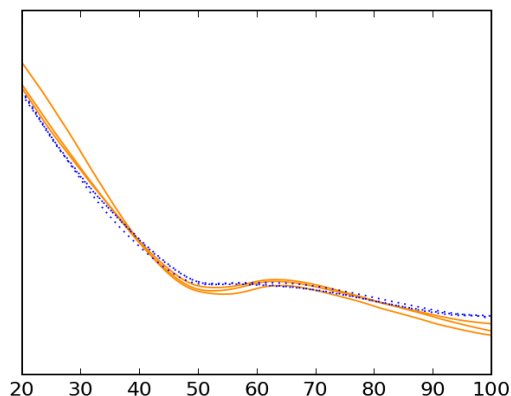

### tris chloride (8.0)

| Grouped by | Tm              | Adjusted pH at Tm |
|------------|-----------------|-------------------|
| 200mM NaCl | 58.68 (+/-0.25) | 7.22              |
| 50mM NaCl  | None            |                   |

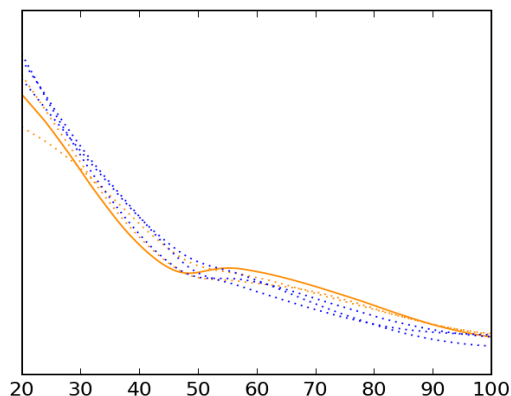

### glycyl-glycine (8.5)

| Grouped by | Tm    | Adjusted pH at Tm |
|------------|-------|-------------------|
| 200mM NaCl | 51.04 | 7.98              |
| 50mM NaCl  | None  |                   |

Monotonic, saturated, in the noise, and outlier curves are dotted, and excluded from Tm calculations  
Curves drawn with dashed lines have unreliable Tm estimates

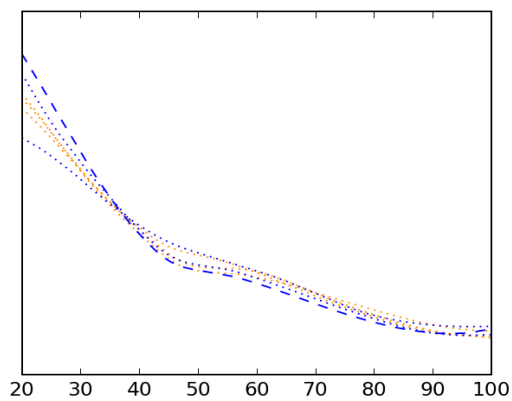

### CHES (9.0)

| Grouped by | Tm   |
|------------|------|
| 200mM NaCl | None |
| 50mM NaCl  | None |

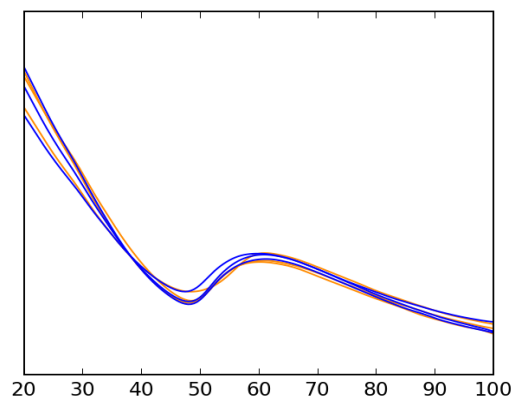

### Salt Only ( )

| Grouped by | Tm              |
|------------|-----------------|
| 200mM NaCl | 53.06 (+/-1.76) |
| 50mM NaCl  | 51.4 (+/-0.29)  |
