# Supplementary material for: Structural and biochemical characterization of the biuret hydrolase (BiuH) from the cyanuric acid catabolism pathway of Rhizobium leguminasorum bv. viciae 3841
Source: PLOS journal article supplement (doi:10.1371/journal.pone.0192736), 2018-02-09

**S3 Figure: Melting temperature of BiuH and its variants.** The melting temperature ( $T_m$ ) was measured by differential scanning fluorimetry in °C (n=3-16 depending on the variants).

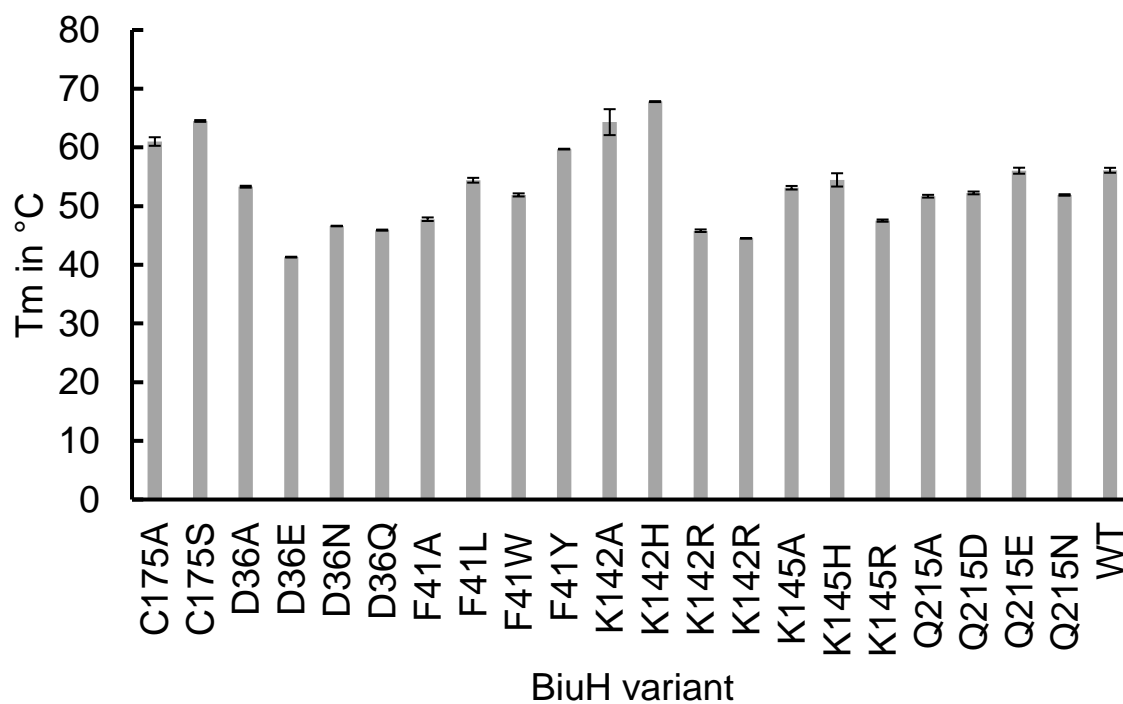

Supplement: S3 (10.1371/journal.pone.0192736.s003) [file journal.pone.0192736.s003]
