# Supplementary material for: Structural and biochemical characterization of the biuret hydrolase (BiuH) from the cyanuric acid catabolism pathway of Rhizobium leguminasorum bv. viciae 3841
Source: PLOS journal article supplement (doi:10.1371/journal.pone.0192736), 2018-02-09

**S4 Fig: Biuret hydrolase (BiuH) activity assays.** A glutamate dehydrogenase (GDH) coupled reaction was used to measure ammonium release in the assays of the biuret hydrolase WT and its variants.

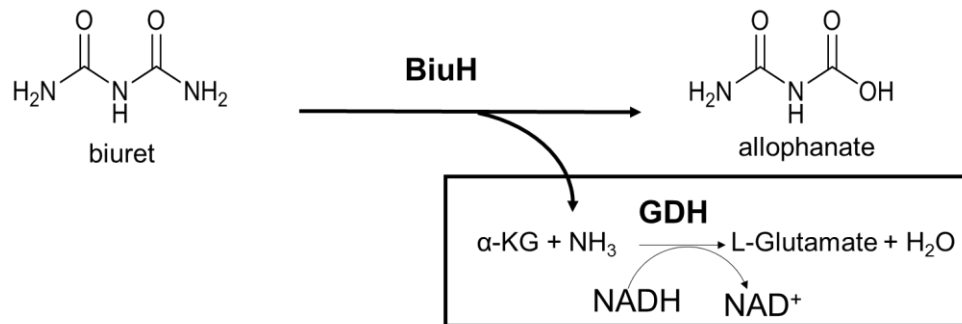

Supplement: S4 (10.1371/journal.pone.0192736.s004) [file journal.pone.0192736.s004]
