# Supplementary material for: Structural and biochemical characterization of the biuret hydrolase (BiuH) from the cyanuric acid catabolism pathway of Rhizobium leguminasorum bv. viciae 3841
Source: PLOS journal article supplement (doi:10.1371/journal.pone.0192736), 2018-02-09

**S5 Fig: Percentage of BiuH activity in function of the *N*-Carbamoyl-D,L-aspartic acid inhibitor concentration (mM).** The activity of BiuH was measured with 0.2 mM biuret and the GDH-coupled assay in the presence of increasing amounts of inhibitor (n=6); *N*-Carbamoyl-DL-aspartic acid structure is shown on the top right corner.

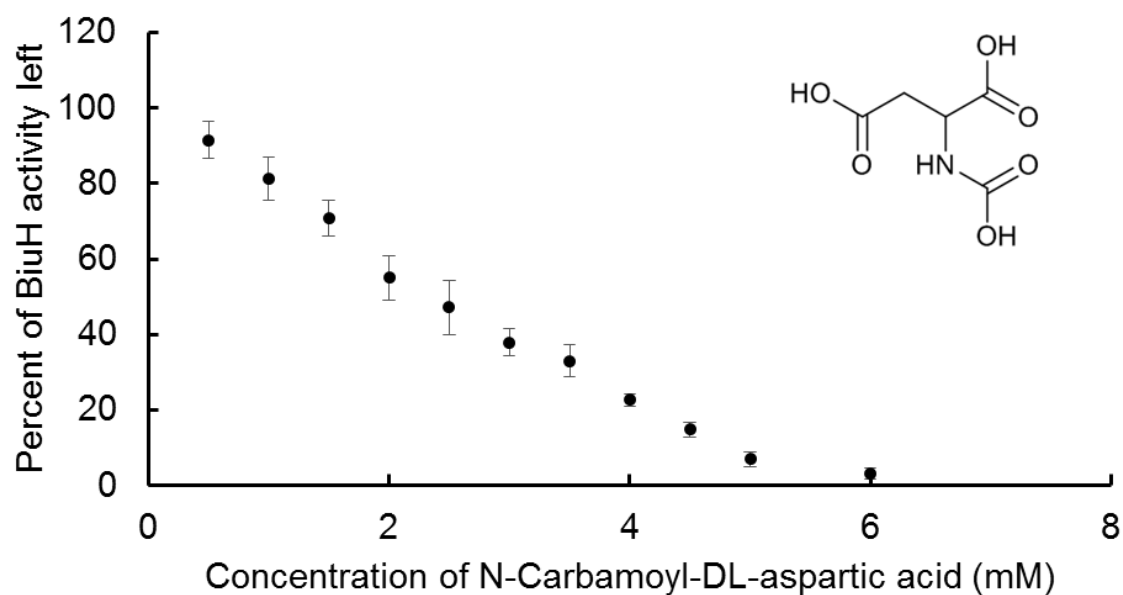

Supplement: S5 (10.1371/journal.pone.0192736.s005) [file journal.pone.0192736.s005]
