# Supplementary material for: Structural and biochemical characterization of the biuret hydrolase (BiuH) from the cyanuric acid catabolism pathway of Rhizobium leguminasorum bv. viciae 3841
Source: PLOS journal article supplement (doi:10.1371/journal.pone.0192736), 2018-02-09

**S8 Fig. Root mean square distance for BiuH active site and biuret during molecular dynamics simulation.** Top: Root mean square distance from the crystallographic conformation for active site residues and biuret over the course of a 500 ns molecular dynamics simulation. Bottom: Distributions of root mean square distances from the crystallographic conformation for active side residues during a 500 ns molecular dynamics simulation.

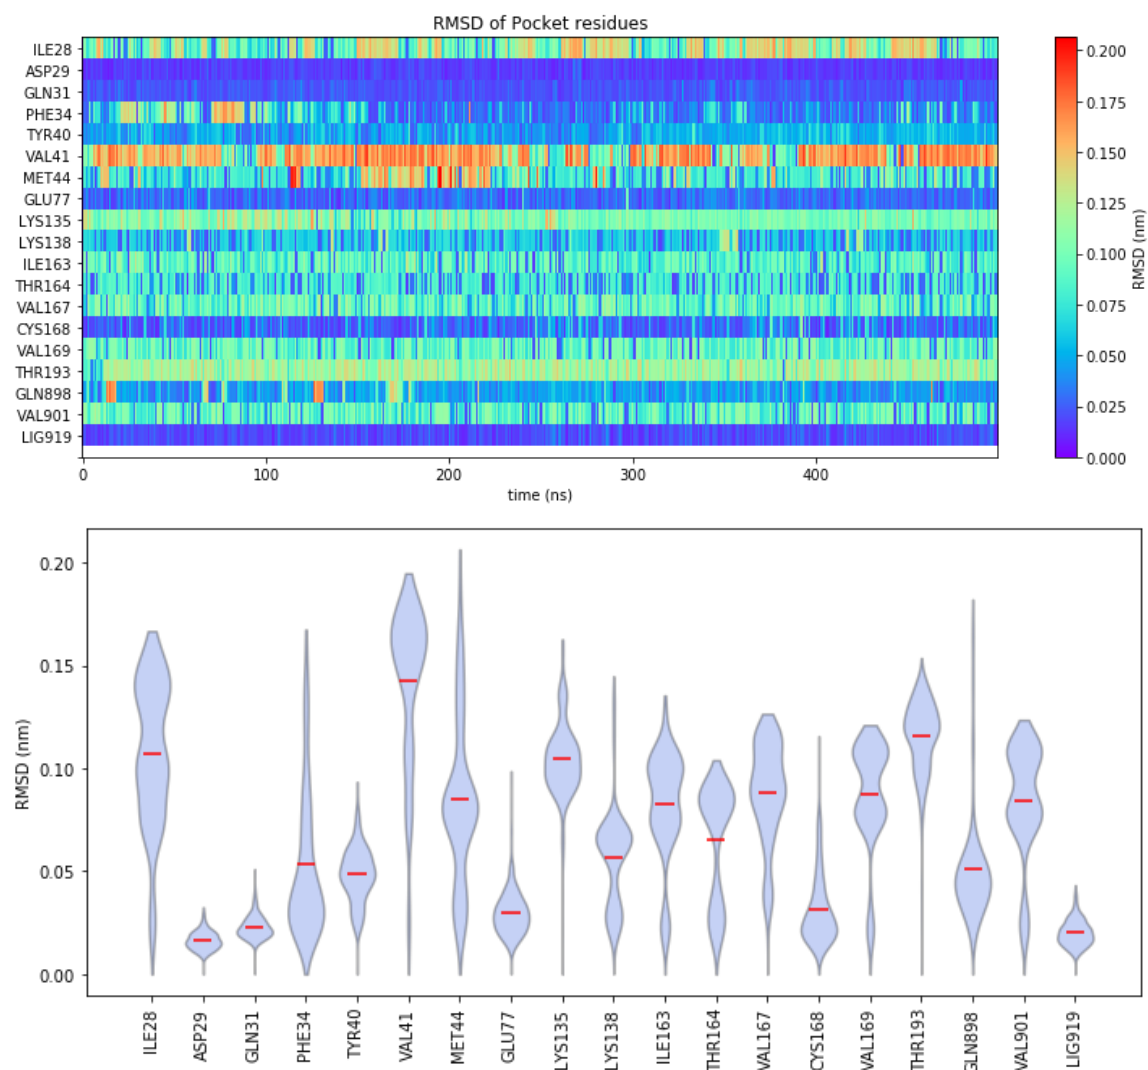

Supplement: S8 (10.1371/journal.pone.0192736.s008) [file journal.pone.0192736.s008]
