# Supplementary material for: Structural and biochemical characterization of the biuret hydrolase (BiuH) from the cyanuric acid catabolism pathway of Rhizobium leguminasorum bv. viciae 3841
Source: PLOS journal article supplement (doi:10.1371/journal.pone.0192736), 2018-02-09

**Fig S11: Difference density map ( $F_o - F_c$ ) shown around Biuret and the N-Carbamoyl-D,L-Aspartic acid inhibitor.** A. Active site of the Cys175Ser BiuH variant shown in cartoon, with the active site amino acids and biuret shown in stick and the difference density map ( $F_o - F_c$ ) in green mesh. B. Active site of the Lys142Ala variant of BiuH showing Cys175 bound to the inhibitor N-carbamoyl-D,L-aspartic acid and the difference density map ( $F_o - F_c$ ), with the active site amino acids and the inhibitor shown in stick and the difference density map ( $F_o - F_c$ ) in green mesh.

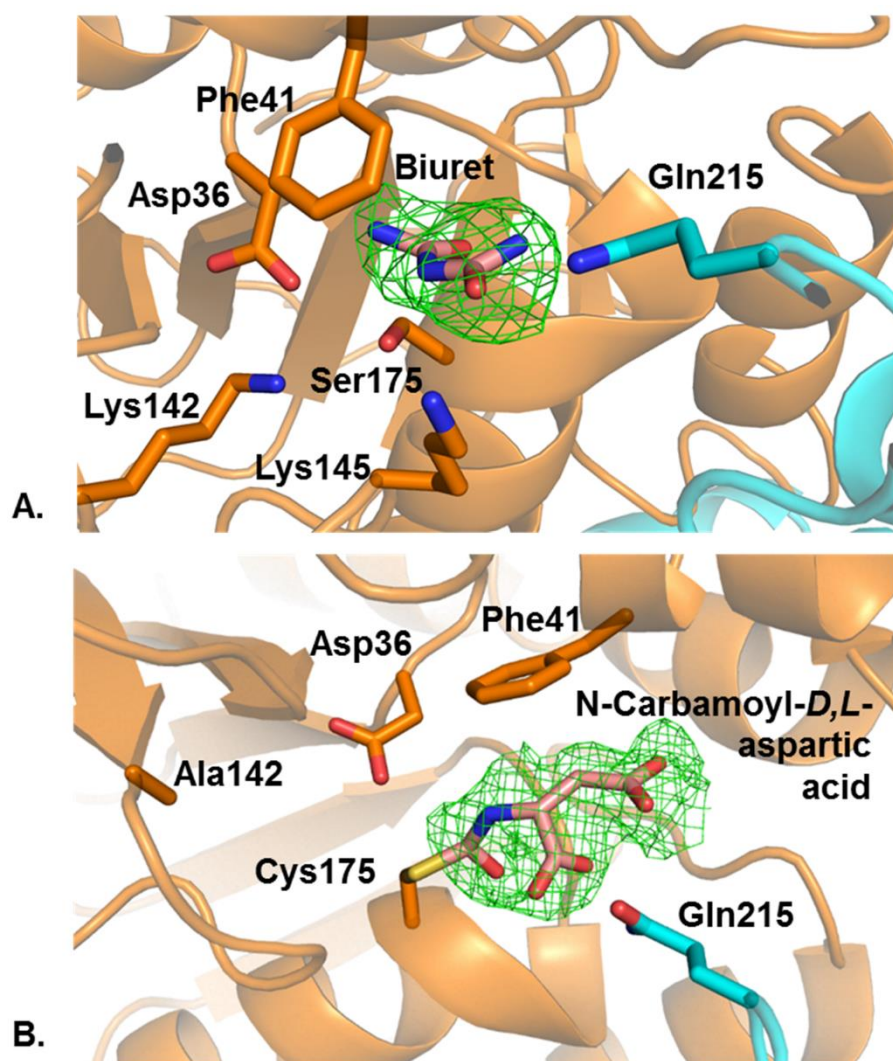

Supplement: S11 (10.1371/journal.pone.0192736.s011) [file journal.pone.0192736.s011]
